# Supplementary material
Source: HighWire-hosted journal article supplement (https://www.rcpjournals.org/highwire/filestream/8695/field_highwire_adjunct_files/0/Aziz_Supplementary_material_tracked.pdf)
Supplement: Aziz_Supplementary_material_tracked.pdf [file Aziz_Supplementary_material_tracked.pdf]

S1. Complete data set for prospective cohort at 0 months and 4 months, and retrospective cohort.

|                                                                                                                                                        |                 | Prospective<br>0 months | Prospective<br>4 months | Retrospective |
|--------------------------------------------------------------------------------------------------------------------------------------------------------|-----------------|-------------------------|-------------------------|---------------|
| <b>1. Do you believe that: (a) your IBD has been well controlled in the past two weeks?</b>                                                            | Yes             | 21                      | 25                      | 29            |
|                                                                                                                                                        | No              | 12                      | 8                       | 4             |
|                                                                                                                                                        | Not sure        | 2                       | 2                       | 2             |
| <b>1. Do you believe that: (b) your current treatment is useful in controlling your IBD?</b>                                                           | Yes             | 26                      | 25                      | 25            |
|                                                                                                                                                        | No              | 2                       | 2                       | 2             |
|                                                                                                                                                        | Not sure        | 6                       | 6                       | 4             |
|                                                                                                                                                        | Not taking meds | 1                       | 2                       | 4             |
| <b>2. Over the past 2 weeks, have your bowel symptoms been getting worse, getting better or not changed?</b>                                           | Better          | 10                      | 6                       | 5             |
|                                                                                                                                                        | Worse           | 3                       | 7                       | 2             |
|                                                                                                                                                        | No change       | 22                      | 22                      | 28            |
| <b>3. In the past 2 weeks, did you: (a) miss any planned activities because of IBD (eg attending school/college, going to work or a social event)?</b> | Yes             | 8                       | 9                       | 7             |
|                                                                                                                                                        | No              | 27                      | 25                      | 28            |
|                                                                                                                                                        | Not sure        | 0                       | 1                       | 0             |
| <b>3. In the past 2 weeks, did you: (b) wake up at night because of symptoms of IBD?</b>                                                               | Yes             | 10                      | 10                      | 14            |
|                                                                                                                                                        | No              | 24                      | 25                      | 20            |
|                                                                                                                                                        | Not sure        | 1                       | 0                       | 1             |
| <b>3. In the past 2 weeks, did you: (c) suffer from significant pain or discomfort?</b>                                                                | Yes             | 10                      | 12                      | 13            |
|                                                                                                                                                        | No              | 25                      | 23                      | 20            |
|                                                                                                                                                        | Not sure        | 0                       | 0                       | 1             |
| <b>3. In the past 2 weeks, did you: (d) often feel lacking in energy (fatigued)?</b>                                                                   | Yes             | 21                      | 19                      | 18            |
|                                                                                                                                                        | No              | 13                      | 12                      | 15            |
|                                                                                                                                                        | Not sure        | 1                       | 4                       | 2             |
| <b>3. In the past 2 weeks, did you: (e) feel anxious or depressed because of your IBD?</b>                                                             | Yes             | 11                      | 13                      | 11            |
|                                                                                                                                                        | No              | 23                      | 21                      | 22            |
|                                                                                                                                                        | Not sure        | 1                       | 1                       | 2             |
| <b>3. In the past 2 weeks, did you: (f) think you needed a change to your treatment?</b>                                                               | Yes             | 6                       | 7                       | 5             |
|                                                                                                                                                        | No              | 23                      | 24                      | 26            |
|                                                                                                                                                        | Not sure        | 6                       | 4                       | 4             |
| <b>4. At your next clinic visit, would you like to discuss: (a) alternative types of drug for controlling IBD?</b>                                     | Yes             | 15                      | 12                      | 9             |
|                                                                                                                                                        | No              | 15                      | 17                      | 21            |
|                                                                                                                                                        | Not sure        | 5                       | 6                       | 5             |
| <b>4. At your next clinic visit, would you like to discuss: (b) ways to adjust your own treatment?</b>                                                 | Yes             | 12                      | 14                      | 9             |
|                                                                                                                                                        | No              | 19                      | 15                      | 19            |
|                                                                                                                                                        | Not sure        | 4                       | 6                       | 7             |
| <b>4. At your next clinic visit, would you like to discuss: (c) side effects or difficulties with using your medicines?</b>                            | Yes             | 8                       | 14                      | 6             |
|                                                                                                                                                        | No              | 25                      | 18                      | 27            |
|                                                                                                                                                        | Not sure        | 2                       | 3                       | 2             |

|                                                                                                                                               |                   |    |    |    |
|-----------------------------------------------------------------------------------------------------------------------------------------------|-------------------|----|----|----|
| <b>4. At your next clinic visit, would you like to discuss: (d) new symptoms that have developed since your last visit?</b>                   | Yes               | 9  | 10 | 7  |
|                                                                                                                                               | No                | 24 | 21 | 25 |
|                                                                                                                                               | Not sure          | 2  | 4  | 3  |
| <b>5. How would you rate the OVERALL control of your IBD in the past two weeks?</b>                                                           | 1                 | 0  | 0  | 0  |
|                                                                                                                                               | 2                 | 2  | 0  | 0  |
|                                                                                                                                               | 3                 | 0  | 3  | 0  |
|                                                                                                                                               | 4                 | 6  | 2  | 3  |
|                                                                                                                                               | 5                 | 0  | 4  | 3  |
|                                                                                                                                               | 6                 | 5  | 3  | 2  |
|                                                                                                                                               | 7                 | 6  | 5  | 7  |
|                                                                                                                                               | 8                 | 8  | 6  | 5  |
|                                                                                                                                               | 9                 | 4  | 9  | 6  |
|                                                                                                                                               | 10                | 4  | 3  | 9  |
| <b>The non-face-to-face service (eg IBD helpline, Patients Know Best) has (a) had a positive impact on my IBD.</b>                            | Disagree strongly | -  | -  | 0  |
|                                                                                                                                               | Disagree          | -  | -  | 10 |
|                                                                                                                                               | Agree             | -  | -  | 12 |
|                                                                                                                                               | Agree strongly    | -  | -  | 12 |
|                                                                                                                                               | N/A               | -  | -  | 1  |
| <b>The non-face-to-face service (eg IBD helpline, Patients Know Best) has (b) helped me to feel more confident in managing my own health.</b> | Disagree strongly | -  | -  | 0  |
|                                                                                                                                               | Disagree          | -  | -  | 7  |
|                                                                                                                                               | Agree             | -  | -  | 15 |
|                                                                                                                                               | Agree strongly    | -  | -  | 12 |
|                                                                                                                                               | N/A               | -  | -  | 1  |
| <b>The non-face-to-face service (eg IBD helpline, Patients Know Best) has (c) improved my quality of life.</b>                                | Disagree strongly | -  | -  | 1  |
|                                                                                                                                               | Disagree          | -  | -  | 10 |
|                                                                                                                                               | Agree             | -  | -  | 12 |
|                                                                                                                                               | Agree strongly    | -  | -  | 8  |
|                                                                                                                                               | N/A               | -  | -  | 4  |

IBD = inflammatory bowel disease; often = more than half of the time.
